# Supplementary material for: Two Polysaccharides from Liupao Tea Exert Beneficial Effects in Simulated Digestion and Fermentation Model In Vitro
Source: MDPI journal article supplement (doi:10.3390/foods11192958), 2022-09-21
Supplement: s1 [file s1]

# Two Polysaccharides from Liupao Tea Exert Beneficial Effects in Simulated Digestion and Fermentation Model In Vitro

## Supplementary Figures:

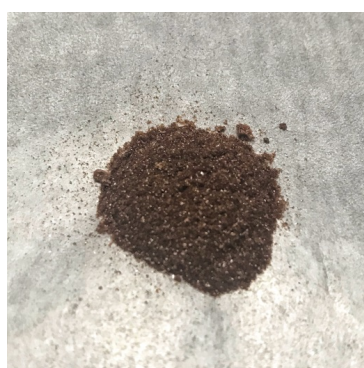

(a)

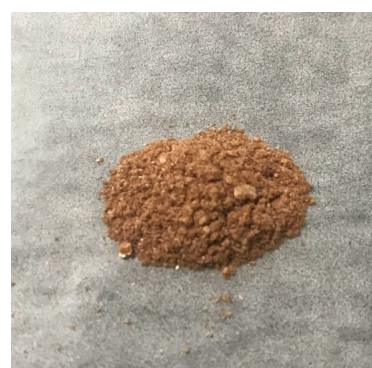

(b)

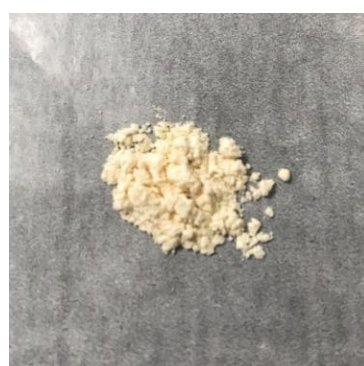

(c)

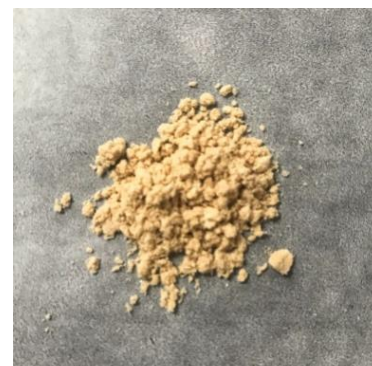

(d)

**Figure S1.** The morphologies of crude TPS (a), refined TPS (b), TPS2 (c) and TPS5 (d).

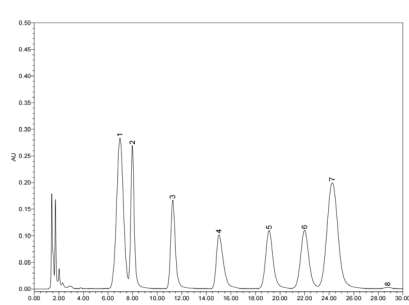

(a)

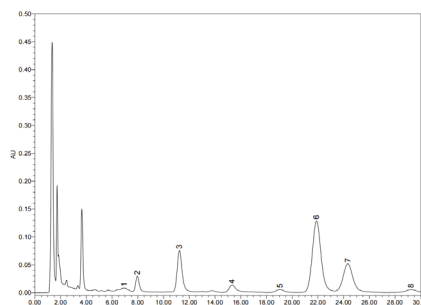

(b)

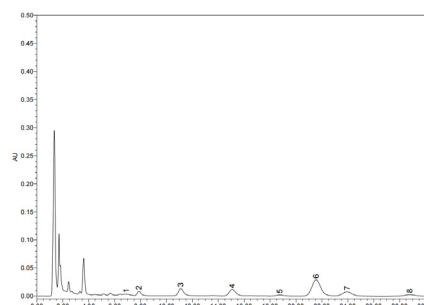

(c)

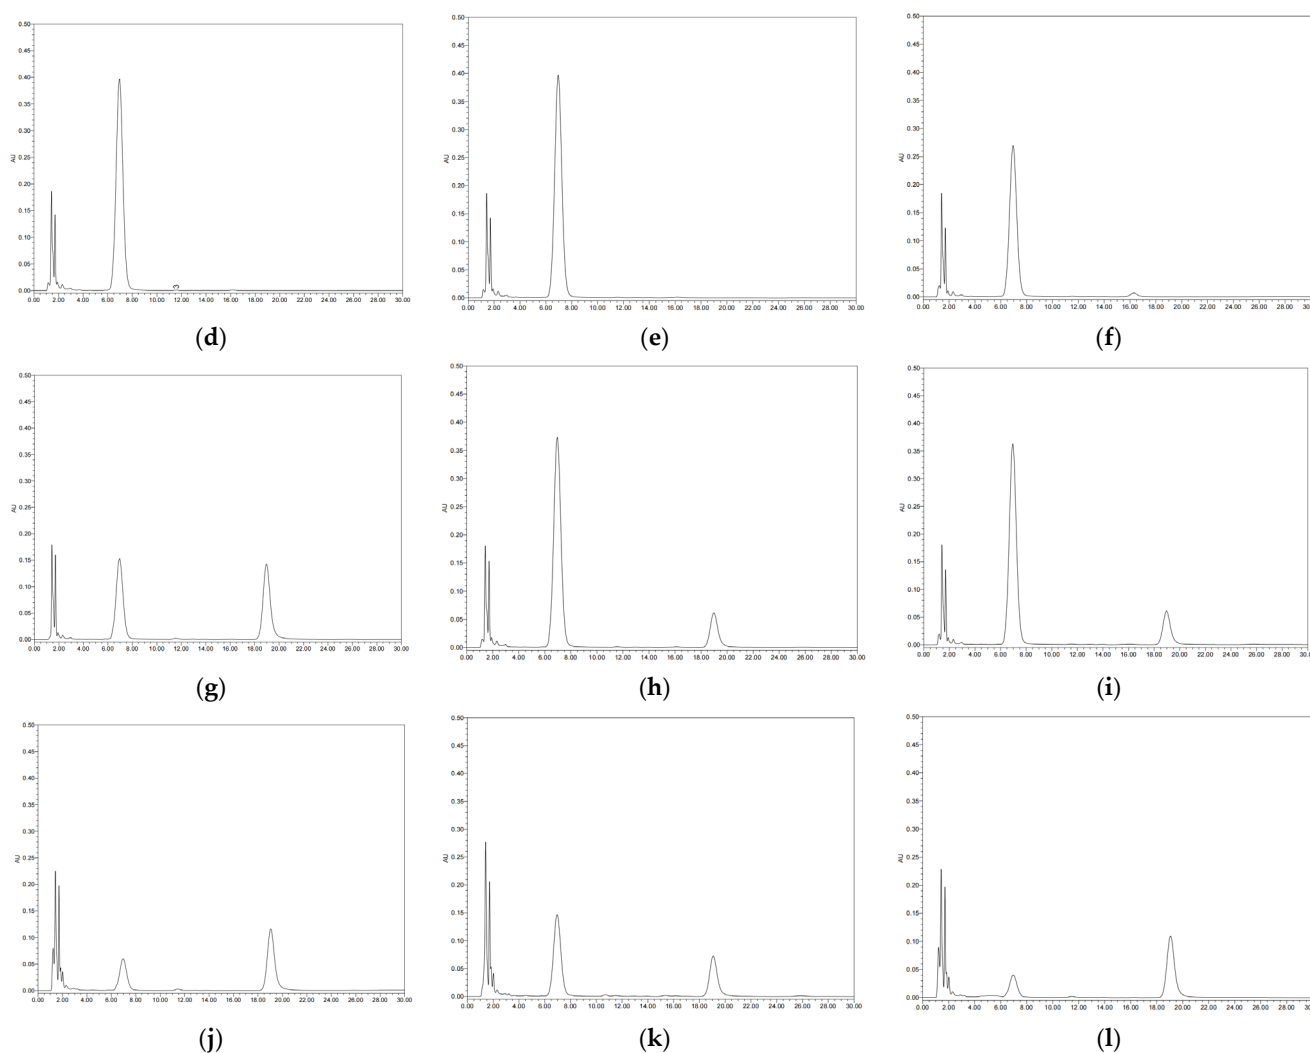

**Figure S2.** The HPLC chromatogram of monosaccharide composition of standard monosaccharides (a), TPS2 (b) and TPS5 (c); The HPLC chromatogram of free monosaccharide determination of the simulated salivary juice (d) and it digested with TPS2 (e) and TPS5 (f); The HPLC chromatogram of free monosaccharide determination of the simulated gastric juice (g) and it digested with TPS2 (h) and TPS5 (i); The HPLC chromatogram of free monosaccharide determination of the small intestinal juice (j) and it digested with TPS2 (k) and TPS5 (l). 1-PMP; 2-Man; 3-Rha; 4-GlcA; 5-Glc; 6-Gal; 7-Ara; 8-unknown.

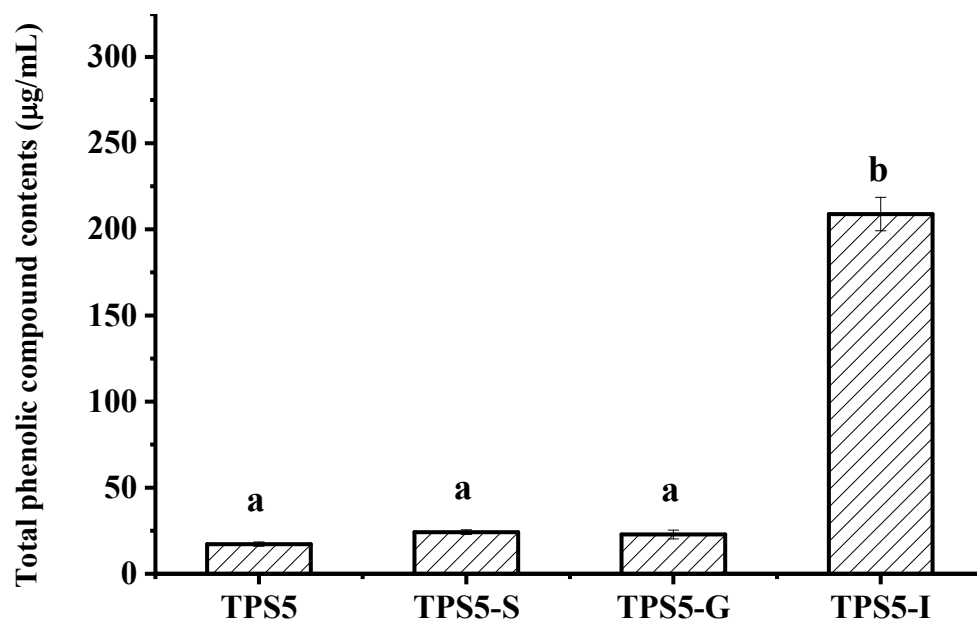

**Figure S3.** Changes of polyphenol content in TPS5 during simulated digestion. TPS5-S indicates TPS5 was digested by salivary; TPS5-G indicates TPS5 was digested by gastric juice and TPS-I indicates TPS5 was digested by intestinal juice. Different letters indicate significant difference ( $p < 0.05$ ).

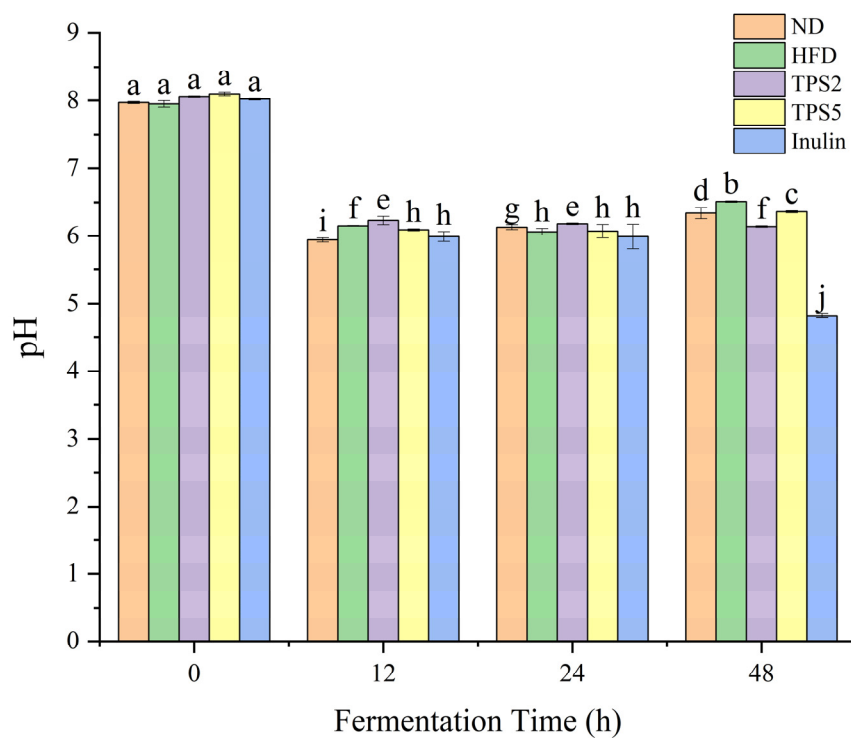

**Figure S4.** Changes in pH during *in vitro* fermentation. Different letters indicate significant difference ( $p < 0.05$ ).

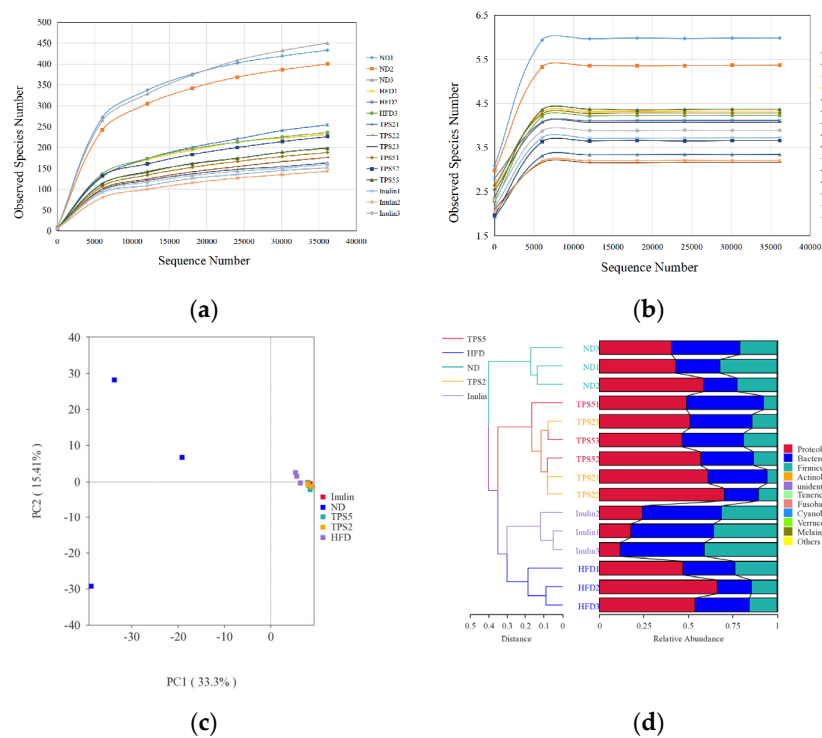

**Figure S5.** Alpha diversity analysis of samples rarefaction analysis (a) and Shannon curves (b). Principal coordinate analysis on Bray–Curtis distance (c) and clustering tree based on Bray–Curtis distance (d).

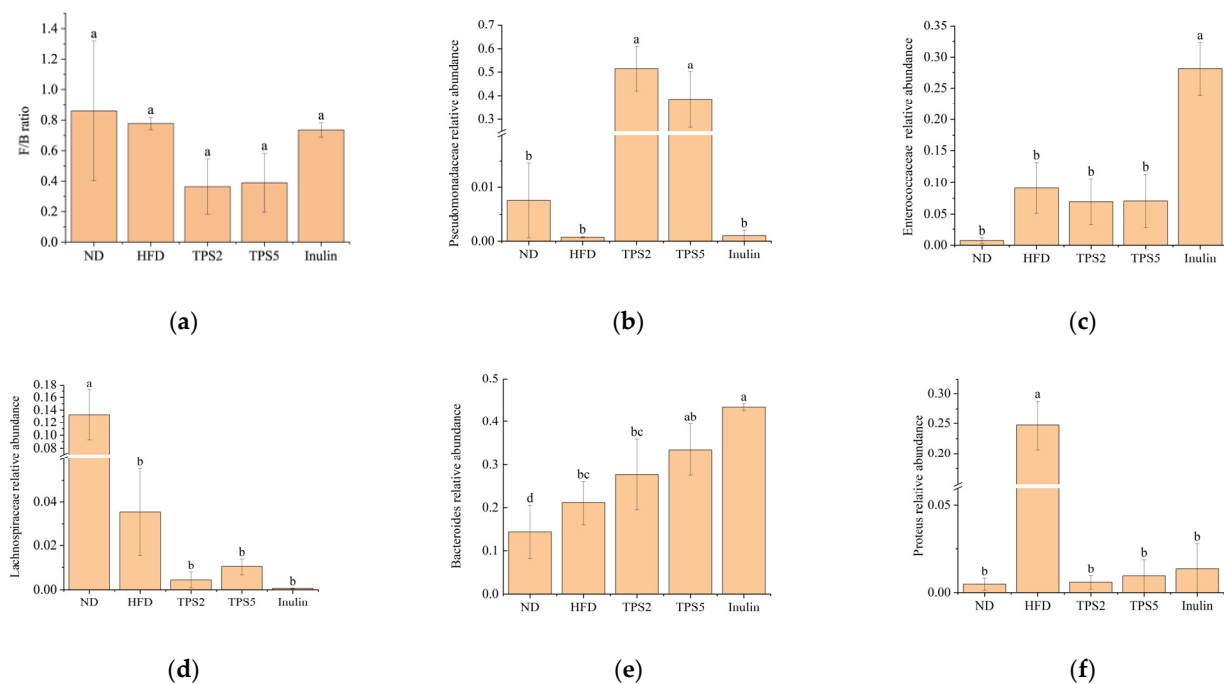

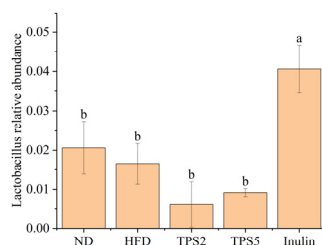

(g)

**Figure S6.** The F/B ratio (a) and the relative abundance of *Pseudomonadaceae* (b), *Enterococcaceae* (c), *Lachnospiraceae* (d), *Bacteroides* (e), *Proteus* (f), *Lactobacillus* (g). Different letters indicate significant difference ( $p < 0.05$ ).

### Supplementary Tables:

**Table S1.** Composition of normal diet and high fat diet.

| Ingredient       | Normal Diet a | High Fat Diet b |
|------------------|---------------|-----------------|
| Corn             | 350           | 350             |
| Wheat bran       | 150           | 150             |
| Bean pulp        | 150           | 150             |
| Soybean oil      | 100           | 100             |
| Fish meal        | 80            | 80              |
| Yeast            | 20            | 20              |
| Mineral mixture  | 35            | 35              |
| Vitamin mixture  | 10            | 10              |
| L-cystine        | 3             | 3               |
| Sucrose          | 0             | 100             |
| Lard             | 0             | 100             |
| Cholesterol      | 0             | 20              |
| Choline chloride | 0             | 2               |

Normal diet was purchased from the Beijing keaoxieli Feed Co., Ltd. The formulation of high fat feed consists of basal feed 68.6%, lard oil 10.0%, sucrose 10.0%, cholesterol 2%, and bile salt 0.2%.

**Table S2.** Serum lever of rats after 14 days animal model establishment.

| Group (mmol/L)                              | ND-Iunduced Rats(n = 3) | HFD-Iunduced Rats(n = 12) |
|---------------------------------------------|-------------------------|---------------------------|
| total cholesterol (TC)                      | 1.27 ± 0.18             | 1.33 ± 0.21**             |
| Triglyceride (TG)                           | 0.33 ± 0.23             | 0.58 ± 0.12**             |
| low density lipoprotein cholesterol (LDL-C) | 0.51 ± 0.04             | 1.58 ± 0.19**             |

\*\* indicates that there is a significant difference ( $p < 0.01$ ).

**Table S3.** Statistics of sequences after treatment.

| Sample | Raw_Reads | Clean_Reads | Base(nt) | AvgLen(nt) | Q20   | GC%   | Effective% |
|--------|-----------|-------------|----------|------------|-------|-------|------------|
| ND1    | 85077     | 80859       | 32930222 | 407        | 78.08 | 52.64 | 95.04      |
| ND2    | 77414     | 74398       | 30157809 | 405        | 78.68 | 52.8  | 96.1       |
| ND3    | 82554     | 80150       | 33254373 | 414        | 78.2  | 52    | 97.09      |
| HFD1   | 79956     | 77260       | 32194701 | 416        | 77.38 | 51.67 | 96.63      |
| HFD2   | 85763     | 80080       | 33170952 | 414        | 83.21 | 51.83 | 93.37      |
| HFD3   | 87820     | 80143       | 33377425 | 416        | 82.55 | 51.23 | 91.26      |

---

|         |       |       |          |     |       |       |       |
|---------|-------|-------|----------|-----|-------|-------|-------|
| TPS21   | 83427 | 80092 | 33217554 | 414 | 81.76 | 49.47 | 96    |
| TPS22   | 82158 | 79838 | 32982138 | 413 | 82.74 | 50.52 | 97.18 |
| TPS23   | 82223 | 80020 | 33164925 | 414 | 82.21 | 49.73 | 97.32 |
| TPS51   | 84544 | 80106 | 32977192 | 411 | 80.29 | 50.05 | 94.75 |
| TPS52   | 87126 | 80092 | 33315673 | 415 | 83.35 | 49.7  | 91.93 |
| TPS53   | 82142 | 80079 | 33220931 | 414 | 82.31 | 49.73 | 97.49 |
| Inulin1 | 88079 | 79903 | 33550921 | 419 | 79.92 | 50.02 | 90.72 |
| Inulin2 | 86215 | 80174 | 33311608 | 415 | 85.01 | 50.55 | 92.99 |
| Inulin3 | 81960 | 80088 | 33616300 | 419 | 79.78 | 49.8  | 97.72 |

---
